1 **Title:** Disentangling the effects of climate change, landscape heterogeneity, and scale on  
2 phenological metrics

3

4 **Authorship:**

5 Erica A. Newman (ORCID: 0000-0001-6433-8594)<sup>3,4\*</sup>

6 Ian K. Breckheimer (ORCID: 0000-0002-4698-977X)<sup>2\* §</sup>

7 Daniel S. Park (ORCID: 0000-0003-2783-530X)<sup>1\* §</sup>

8

9 <sup>1</sup> University of Arizona, Department of Ecology and Evolutionary Biology, Tucson, AZ 85721,  
10 USA

11 <sup>2</sup> Arizona Institutes for Resilience, University of Arizona, Tucson, AZ 85721, USA

12 <sup>3</sup> Rocky Mountain Biological Laboratory, Gothic, CO 81224, USA

13 <sup>4</sup> Purdue University, Department of Biological Sciences, West Lafayette, IN 47907, USA

14

15 \* Authors contributed equally to this work.

16 § Authors for correspondence (ikb@rmbi.org; danielpark@purdue.edu)

17

18 **Keywords:** climate change, environmental heterogeneity, flowering, landscape ecology,  
19 macroecology, phenology, scaling, simulation, statistical aggregation, temporal resolution

20

21 **Abstract:**

22 Phenology, the study of the timing of cyclical life history events and seasonal changes, is a  
23 fundamental aspect of how individual species, communities, and ecosystems will respond to  
24 climate change. Both biotic and abiotic phenological patterns are changing rapidly in response  
25 to changing seasonal temperatures and other climate-related drivers, and the consequences of

26 these shifts for individual species and entire ecosystems are largely unknown. Landscape-scale  
27 simulations can address some of these needs for better predictions by demonstrating how  
28 phenology measures can vary with spatial and temporal grain of observations, and how  
29 phenological responses can vary with landscape heterogeneity and climate drivers. To explicitly  
30 examine the spatial and temporal scale-dependence of multiple phenology measures, we  
31 constructed simulated landscapes populated by virtual plant species with realistic phenologies  
32 and environmental sensitivities. This enabled us to examine phenology measures and  
33 environmental sensitivities along a continuum of spatial and temporal grains, while also  
34 controlling other aspects of sampling design. By relating measures of phenology calculated at a  
35 given spatiotemporal grain to average environmental conditions at that same grain size, we are  
36 able to determine observed environmental sensitivities for multiple phenological metrics at that  
37 spatial and temporal scale. We demonstrate that different phenological events change distinctly  
38 and predictably with spatial and temporal measurement scale, opening the way to incorporating  
39 scaling laws into predictions. Using plant flowering as our example, we identify that the timing of  
40 the beginnings or ends of an event (e.g., First Flower date, Last Flower date), can be especially  
41 sensitive to the spatial and temporal grain (or resolution) of observations. Our work provides an  
42 initial assessment of the role of observation scale in landscape phenology, and a general  
43 approach for incorporating scale-dependence into predictions of a variety of phenological time  
44 series.

45

46

47

## 48 **Introduction**

49 Over the last two decades, the study of phenology, or the timing of biological and seasonal  
50 events, has taken on new relevance, as the effects of climate change have become increasingly  
51 noticeable. The consequences of phenological shifts and mismatches are unknown (Memmott

52 et al. 2007). Much work has been done to assess the direction, magnitude, and mechanisms of  
53 phenological response across species, utilizing controlled experiments (Price and Waser 1998),  
54 remote sensing methods (X. Zhang et al. 2003), citizen science (Willis et al. 2017), natural  
55 history collections (Park et al. 2018), modeling, and combinations thereof. Phenological studies  
56 have long focused at the at the scale of individual organisms and plots, but large-scale  
57 digitization of natural history collections and survey data, as well as the advent of remotely  
58 sensed land surface phenology via satellite has increasingly facilitated research at more  
59 extensive taxonomic, spatial, and temporal scales over the last few decades. As a result, broad  
60 trends such as a general acceleration of plant phenology in response to warming, have  
61 emerged (Cleland et al. 2007).

62

63 However, a growing body of research suggests that phenological landscapes are highly  
64 complex, varying across spatial scales both within and among species (Körner and Basler 2010;  
65 Lapenis et al. 2014; Zohner and Renner 2014; H. Zhang et al. 2015; Cole and Sheldon 2017;  
66 Asam et al. 2018; Park et al. 2018). Though previous research spans diverse taxonomic,  
67 temporal, and spatial scales, harmonizing diverse scales of information has proven to be a  
68 challenge to the characterization of phenology, and we still lack a robust theoretical framework  
69 that can integrate this important body of knowledge (Newman et al. 2019; Gonzalez et al. 2020).  
70 Previous attempts to directly link observations made at different scales (e.g., ground-based  
71 observations of individuals vs satellite-derived landscape observations) have often yielded poor  
72 results (Chuine, Cambon, and Comtois 2000; Badeck et al. 2004; X. Zhang et al. 2017).  
73 Because scale and scaling are fundamental to ecological patterns including phenology  
74 (Woodcock and Strahler 1987; Levin 1992; Wiens 1989), synthesizing observations made at  
75 different spatiotemporal resolutions and extents are at the forefront of current phenological  
76 research (Cleland et al. 2007). Such efforts are necessary to provide accurate predictions about  
77 future global change impacts.

78

79 In this study, we use simulated datasets to compare spatiotemporal scaling across  
80 heterogeneous environments and demonstrate that the properties of phenological events can  
81 change predictably with scale. We thus provide a framework for increasing our understanding  
82 how the phenology functions at scales from the individual to the landscape via empirical and  
83 theoretical synthesis. In our instance, we use an empirically-informed simulation for virtual  
84 landscapes and species, to elucidate the inherent sensitivities of phenological metrics to  
85 measurement scale, independent of other factors, such as exogenous climate forcings. We  
86 demonstrate that the properties of multiple phenological events change distinctly from one  
87 another, but predictably with spatial and temporal measurement scale. Our simulation work  
88 highlights that some phenological measures (such as measures of peak or central tendency)  
89 are robust to large changes in spatial and temporal grain, while others are not. It also  
90 demonstrates that the effects of spatial and temporal sampling, aggregation, and scaling can be  
91 disentangled effectively from the effects of landscape heterogeneity and the effects of  
92 exogenous climate forcings on individual phenological metrics.

93

## 94 **Methods**

### 95 *Landscape Phenology Simulations*

96 Landscape simulation models have the potential to predict ecological metrics, including  
97 phenological time series, across scales, and provide a quantitative framework for investigating  
98 the implications of these predictions (Turner, Dale, and Gardner 1989; Wagner and Fortin  
99 2005). To explicitly examine the spatial and temporal scale-dependence of multiple phenology  
100 measures, we constructed simulated landscapes populated by virtual plant species with realistic  
101 phenologies and environmental sensitivities. This simulation approach allowed us to examine  
102 phenology measures and environmental sensitivities along a continuum of spatial and temporal  
103 grains, while tightly controlling other aspects of sampling design. The simulated landscapes,

104 and the species inhabiting them, were constructed to have similar properties to flowering plant  
105 communities in montane to subalpine environments in western North America, and were derived  
106 from a synthesis of plot-scale flowering phenology datasets across three locations: Mount  
107 Rainier National Park in the Washington Cascades (Theobald, Breckheimer, and  
108 HilleRisLambers 2017), MPG Ranch in the Sapphire Range of Montana (Durham et al. 2017),  
109 and Rocky Mountain Biological Laboratory in Western Colorado (Iler et al. 2017). As employed  
110 here, this method incorporates important phenological information and landscape heterogeneity  
111 factors for montane to subalpine environments in western North America, but could be used  
112 with other factors, simulated landscapes and species for other ecosystems.

113

114 To construct realistic phenological responses of virtual species, we first fit a hierarchical non-  
115 linear model describing species-specific phenologies and responses to climate for the combined  
116 three field datasets. Because the model drew species-specific parameters from statistical  
117 distributions, we could use this model to generate realistic phenological responses for 45 virtual  
118 species (Fig. 1). Virtual species are distinguished by their abundances, their means and  
119 variances for phenological response dates, and their peak abundance distributions across  
120 environmental gradients. Similarly, empirical measurements of microclimate at each field site  
121 were used to fit variogram models describing the pattern of spatial covariance of environmental  
122 variables at the study sites. These models were used to construct virtual landscapes with  
123 realistic spatial patterns of microclimate (Fig. 1), which in turn drive realistic spatial patterns of  
124 plant phenology. We then sampled plant phenology on the virtual landscapes at a variety of  
125 different spatial grains (from 2m - 1024m) and temporal grains (sampling intervals from 1 - 17  
126 days), spanning the most prevalent spatial and temporal grains represented in the literature  
127 (Park et al., *in review*) (throughout the manuscript, spatial grains are reported as the linear  
128 measure of one side of a square unit, for example, 2m grain size corresponds to 4m<sup>2</sup> area  
129 units). This allowed us to calculate a variety of measures of flowering phenology, including

130 dates of first flowering, peak flowering, last flowering (or “First Flower,” “Peak Flower,” and “Last  
131 Flower,” respectively) and flowering duration, for each virtual species at each spatial and  
132 temporal grain.

133

134 Our approach makes use of “fully-nested” data structure, that is, data that have full spatial and  
135 temporal data associated with phenological events, which can be aggregated to increasingly  
136 coarser resolutions without loss of information. In the simulation, we have “perfect knowledge”  
137 of all phenological events, and from these, we can construct a scaling law related to what date  
138 of first, last, or peak event emerges from each resolution, up to the full spatial or temporal extent  
139 under consideration. This approach is similar to that sometimes used in macroecology, where  
140 mathematical scaling laws are constructed, and then extrapolated to unmeasured scales (Harte  
141 2011; Harte and Newman 2014). For each phenology measure, we determined scaling effects  
142 by comparing the phenology measures computed at a given scale to the measures taken at the  
143 finest spatial and temporal scale available: 2m grain size and daily sampling. Code for the  
144 simulation and detailed methods can be found at:

145 [https://github.com/ibreckhe/phenoscaling\\_sims](https://github.com/ibreckhe/phenoscaling_sims)

146

147 Our simulation approach also allowed us to examine the scale-dependence of observed  
148 environmental sensitivities. The phenology of the virtual species respond to two aspects of the  
149 environment: the timing of seasonal snowpack disappearance (snow disappearance day, SDD)  
150 and the accumulation of air temperature forcing (growing degree-days) in the 90 days after  
151 snow disappearance (GDD), both of which vary across each virtual landscape. By relating  
152 measures of phenology calculated at a given spatial and temporal grain to average  
153 environmental conditions at that same grain size, we can determine observed environmental  
154 sensitivities at that spatial and temporal scale (Fig. 1). Because the “true” environmental  
155 sensitivities of these virtual species are known (as they were generated from distributions of

156 sensitivities in the hierarchical model), we can measure scale effects by comparing the  
157 observed sensitivities at a given scale to the true values.

158

## 159 **Results**

### 160 *Landscape phenology simulations*

161 Simulated landscapes populated by virtual species can be used to examine the spatiotemporal  
162 scale-dependence of multiple phenology measures, and their sensitivity to environmental  
163 forcings. For instance, here, simulated landscapes and species were constructed to have similar  
164 properties to flowering plant communities in montane to subalpine environments in western  
165 North America, derived from a synthesis of plot-scale flowering phenology datasets (Theobald,  
166 Breckheimer, and HilleRisLambers 2017; Durham et al. 2017; Iler et al. 2017). Because the  
167 “true” environmental sensitivities of these virtual species are known, we were able to measure  
168 scale effects by comparing the observed sensitivities at a given spatial or temporal scale to their  
169 true values.

170

### 171 *Comparing the scale dependence of phenological metrics*

172 To better understand the effects of scale and environmental forcings on phenological metrics,  
173 we investigated four measures of phenology – (the dates of) First Flower, Peak Flower, Last  
174 Flower, and Flowering Duration – and their sensitivity to environmental conditions using the  
175 simulation approach described in Figure 1. All examined metrics were scale-dependent, with  
176 some processes being more sensitive to statistical aggregation over time and space than others  
177 (Fig. 2). At coarser spatial grains, First Flower always appeared earlier, Last Flower always  
178 appeared later, and Flowering Duration therefore became longer. This was because coarser  
179 spatial samples incorporated more microclimate heterogeneity, and thus included some areas  
180 where flowering started earlier and later. At coarser temporal grains, observations of First  
181 Flower became later, Last Flower became earlier, and Flowering Duration therefore decreased.

182 This was because less frequent observations were likely to miss the true start and end of the  
183 season, delivering estimates that skewed late for First Flower, and early for Last Flower. We  
184 consistently found that measures involving the start and end of the flowering season (Flowering  
185 Duration, First Flower, Last Flower), were considerably more scale-sensitive than the timing of  
186 Peak Flower, both in spatial and temporal grain.

187

#### 188 *Scale dependence in phenological sensitivity*

189 Observed phenological sensitivities can also be strongly scale-dependent (Fig.3, top panels).  
190 Spatial scaling effects caused sensitivity estimates to differ at 1km scales by up to +0.38 days  
191 per snow disappearance day, and by up to 0.02 days per accumulated °C compared to  
192 estimates at the finest spatial grain of 2m (Fig.3, top panels). The environmental sensitivities of  
193 start and end of season measures were considerably more scale dependent than the  
194 environmental sensitivity of Peak Flower, which was essentially stable across the spatial grains  
195 we tested. For most of the virtual species and landscape combinations, changes in spatial grain  
196 altered the magnitude, but not direction, of expected phenological shifts in response to changing  
197 forcing. For some species/landscape combinations, however, shifts in observation grain caused  
198 environment – phenology relationships to change sign. This was especially common for the  
199 environmental sensitivities of Flowering Duration, which changed sign in 24% of  
200 species/landscape combinations for SDD, and 21% of combinations for GDD at 1km spatial  
201 grains, compared to 2m grains (Fig. 3, bottom panels). These results highlight the importance of  
202 spatiotemporal grain in the reporting and analysis of phenology measures, especially for those  
203 that correspond to the start or end of a process.

204

#### 205 **Discussion**

206 Understanding and predicting the timing of phenological events is critically important to  
207 ecologists, conservation biologists, and evolutionary biologists. Climate change simultaneously



208 alters multiple ecological axes, and phenological events are among the most prominently  
209 affected (Wolkovich, Cook, and Davies 2014). The timing and location of phenological events  
210 provides structure to plant communities and their associated mutualists and predators, and  
211 although consequences of disruptions to these patterns have unknown consequences, lack of  
212 availability of resources at critical times are expected to negatively impact abundance of  
213 individual species as well as community structure, and may lead to extinctions (Memmott et al.  
214 2007). Spatiotemporal biodiversity increases niche complementarity in species interactions and  
215 affects resource partitioning, reducing competition among co-occurring species (Venjakob et al.  
216 2016). Thus, changes in temporal plant community composition can affect resource availability,  
217 trophic interactions, diversity of associated animal communities, and ecosystem services  
218 (Corlett and Lafrankie 1998; Edwards and Richardson 2004; Post and Forchhammer 2008;  
219 Sackett et al. 2011; Kudo and Ida 2013; Kendrick et al. 2015). Despite the importance of the  
220 interaction between climate and phenology, we have lacked an understanding of key scale-  
221 dependent mechanisms that influence phenological responses across landscapes. Indeed, it  
222 has become increasingly clear that we cannot simply extrapolate phenological knowledge  
223 across scales (Tian et al. 2020; Xie and Wilson 2020).

224  
225 The scale dependence we observe in the phenological responses of species and communities  
226 can be attributed to a number of factors. These include environmental heterogeneity, variation in  
227 species' sensitivities to environmental forcings across the landscape, as well as artifacts of  
228 statistical aggregation (Levin 1992). To account for these effects when integrating knowledge  
229 across scales, it is necessary to not only quantify the degree of scale dependence, but to  
230 elucidate the cause. The simulation approach we outline provides a way to address this issue  
231 and facilitate the informative integration of phenological information across scales.

232

233 We recognize several limitations to our study, enumerated here: (1) Our simulation approach

234 assumes that the same level of detail is captured at every scale of observation; (2) Our  
235 simulated landscape and species were based on empirical data on flowering plant communities  
236 in montane to subalpine environments in western North America; (3) The results of our  
237 simulations may not apply universally across systems and all measures of phenological events,  
238 however, they should be general enough to apply to systems with well-defined seasons, and  
239 spatial domains; (4) The type of data needed to extract these scaling laws have the requirement  
240 that they be “fully-nested,” that is, to have full spatial and temporal data associated with  
241 phenological events that can then be aggregated to coarser and coarser resolution. However,  
242 recent advances in remote sensing technologies and machine learning applications are making  
243 it increasingly possible to overcome these limitations, and to identify functional types, species,  
244 and even individuals from large scale data collected from phenocams, drones, and satellites  
245 (Assmann et al. 2020; Rossi et al. 2019). Furthermore, our simulation approach can be adapted  
246 to less than ideal datasets to parse and account for at least a portion of the variation in  
247 phenological measurements among studies conducted at different scales.

248  
249 We present a conceptual framework for landscape-scale simulations of phenological time series  
250 that builds off of multiscale observations to better investigate how the seasonality of ecosystems  
251 across landscapes and seascapes respond to environmental variability and change. Along  
252 these lines, we provide an example approach for estimating scale dependence for phenological  
253 metrics for plants across both spatial and temporal grain and resolution, which makes use of  
254 fully-nested data structures. We provide guidance on how to create null models for spatial and  
255 temporal scaling with individual phenological metrics, as well as software code in support of  
256 these null models. These methods can be easily adapted to other phenological metrics,  
257 landscapes, and ecosystems. These efforts may lead to better disentangling of the effects of  
258 landscape heterogeneity and scale from the true effects of climate change. We thus set the  
259 stage for a new generation of empirical research in the field that builds off of multi-scale

260 observations to understand how phenology across Earth's ecosystems respond to  
261 environmental variability and change.

262

### 263 **Acknowledgements**

264 We thank DH Hembry for manuscript edits and discussions. We also thank BJ Enquist and  
265 members of the Bridging Biodiversity and Conservation Science (BBCS) program at the  
266 University of Arizona for their comments on earlier versions of this work. DSP was supported by  
267 NSF-DEB 1754584, IKB was supported by a National Science Foundation Postdoctoral  
268 Fellowship in Biology (PRFB-1711936).

269

270

271

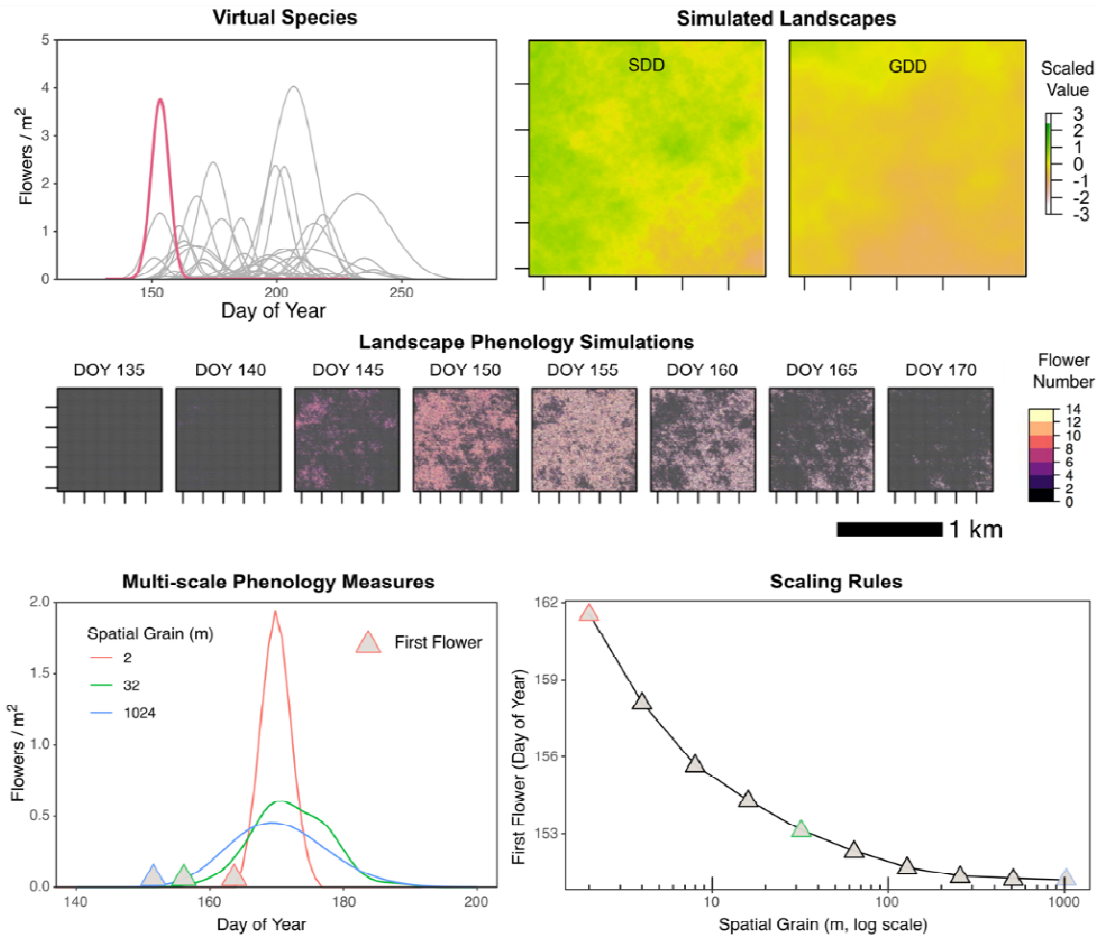

272

273 **Figure 1.** Summary of the simulation approach. Realistic flowering phenologies and responses  
274 to climate for virtual species (top-right panel), were generated from a Bayesian nonlinear model.  
275 Modeled flower densities were a function of day of year (DOY) and two climate variables: the  
276 snowpack disappearance day (SDD), and post-snow air temperature accumulation (Growing  
277 Degree-Days; GDD), both of which were allowed to vary across virtual landscapes as  
278 multivariate Gaussian random fields (top-right panels). Simulated flower counts were generated  
279 across the growing season on these landscapes (middle panels), and the progression of  
280 flowering was then summarized at a variety of spatial grains (bottom-left panel). Phenology  
281 measures such as date of First Flower were extracted from these time series at each spatial  
282 and temporal grain and used to examine scaling relationships (bottom-right panel).

283

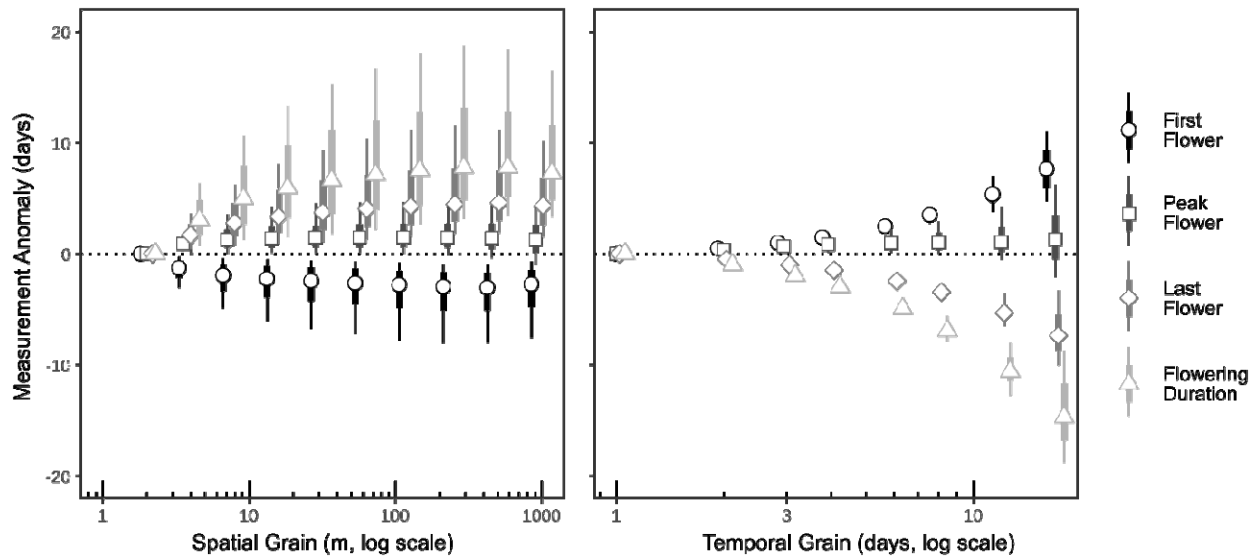

284

285

286 **Figure 2.** Simulation results demonstrating how phenology measures can vary with spatial and

287 temporal grain of observations (left and right panels, respectively). Simulations place virtual

288 plant species with a variety of realistic phenological responses to climate on virtual landscapes

289 modeled after subalpine meadow ecosystems. Four phenology measures (First Flower, Peak

290 Flower, Last Flower, and Flowering Duration) were computed after sampling these virtual

291 landscapes at 10 different spatial grains (between 2 and 1000m), and 10 different spatial

292 grains (between 1 per day and one per 17 days). Thick bars and thin bars represent 25/75%

293 and 10/90% quantiles of the measures across all virtual species and landscapes.

294

295

296

297

298

299

300

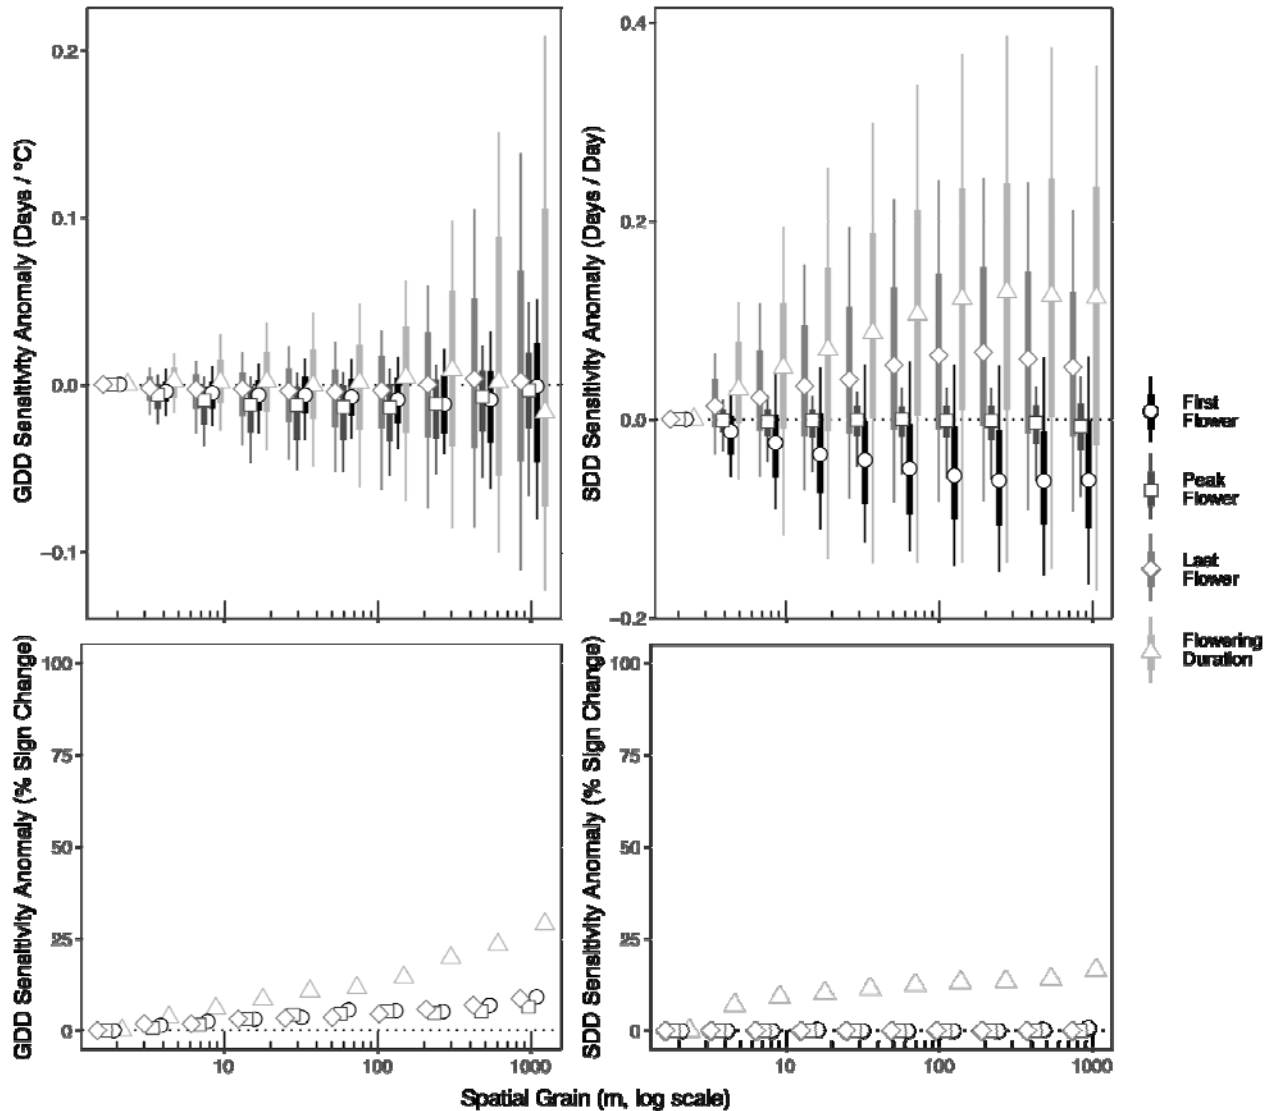

301

302

303 **Figure 3.** Simulation results demonstrating how environmental sensitivities can vary with the  
304 spatial grain of observations. Climate variables driving plant phenology were spring air  
305 temperature (Growing Degree-Days or GDD; left panels), and the timing of snowpack  
306 disappearance (SDD; right panels). Top panels show the change in environmental sensitivities  
307 as a function of spatial grain. Thick bars and thin bars represent 25/75% and 10/90% quantiles  
308 of the measures across all virtual species and landscapes. To put these anomalies in  
309 proportion, the median GDD sensitivity across all species and phenology measures at 2m grain

310 was 0.10 days / 10 °C, and the median SDD sensitivity was 0.52 days / day. Bottom panels  
311 show the percent of virtual species and landscapes where observed environmental sensitivities  
312 at a given scale were of a different sign than sensitivities at the finest spatial grain (2m).

313 **Literature Cited**

- 314 Asam, Sarah, Mattia Callegari, Michael Matiu, Giuseppe Fiore, Ludovica De Gregorio,  
315 Alexander Jacob, Annette Menzel, Marc Zebisch, and Claudia Notarnicola. 2018.  
316 “Relationship between Spatiotemporal Variations of Climate, Snow Cover and Plant  
317 Phenology over the Alps—An Earth Observation-Based Analysis.” *Remote Sensing* 10  
318 (11): 1757.
- 319 Assmann, Jakob J., Isla H. Myers-Smith, Jeffrey T. Kerby, Andrew M. Cunliffe, and Gergana N.  
320 Daskalova. 2020. “Drone Data Reveal Heterogeneity in Tundra Greenness and Phenology  
321 Not Captured by Satellites.” *Environmental Research Letters: ERL [Web Site]* 15 (12):  
322 125002.
- 323 Badeck, Franz-W, Alberte Bondeau, Kristin Bottcher, Daniel Doktor, Wolfgang Lucht, Jorg  
324 Schaber, and Stephen Sitch. 2004. “Responses of Spring Phenology to Climate Change.”  
325 *The New Phytologist* 162 (2): 295–309.
- 326 Chuine, I., G. Cambon, and P. Comtois. 2000. “Scaling Phenology from the Local to the  
327 Regional Level: Advances from Species-Specific Phenological Models.” *Global Change  
328 Biology* 6 (8): 943–52.
- 329 Cleland, Elsa E., Isabelle Chuine, Annette Menzel, Harold A. Mooney, and Mark D. Schwartz.  
330 2007. “Shifting Plant Phenology in Response to Global Change.” *Trends in Ecology &  
331 Evolution* 22 (7): 357–65.
- 332 Cole, Ella F., and Ben C. Sheldon. 2017. “The Shifting Phenological Landscape: Within-and  
333 between-Species Variation in Leaf Emergence in a Mixed-Deciduous Woodland.” *Ecology  
334 and Evolution* 7 (4): 1135–47.
- 335 Corlett, Richard T., and James V. Lafrankie. 1998. “Potential Impacts of Climate Change on  
336 Tropical Asian Forests through an Influence on Phenology.” *Climatic Change* 39 (2-3): 439–  
337 53.



- 338 Durham, Rebecca A., Daniel L. Mummey, Lauren Shreading, and Philip W. Ramsey. 2017.  
339 “Phenological Patterns Differ between Exotic and Native Plants: Field Observations from  
340 the Sapphire Mountains, Montana.” *Natural Areas Journal* 37 (3): 361–81.
- 341 Edwards, Martin, and Anthony J. Richardson. 2004. “Impact of Climate Change on Marine  
342 Pelagic Phenology and Trophic Mismatch.” *Nature* 430 (7002): 881–84.
- 343 Gonzalez, Andrew, Rachel M. Germain, Diane S. Srivastava, Elise Filotas, Laura E. Dee,  
344 Dominique Gravel, Patrick L. Thompson, et al. 2020. “Scaling-up Biodiversity-Ecosystem  
345 Functioning Research.” *Ecology Letters* 23 (4): 757–76.
- 346 Harte, John. 2011. *Maximum Entropy and Ecology: A Theory of Abundance, Distribution, and*  
347 *Energetics*. OUP Oxford.
- 348 Harte, John, and Erica A. Newman. 2014. “Maximum Information Entropy: A Foundation for  
349 Ecological Theory.” *Trends in Ecology & Evolution* 29 (7): 384–89.
- 350 Iler, Amy M., David W. Inouye, Niels M. Schmidt, and Toke T. Høye. 2017. “Detrending  
351 Phenological Time Series Improves Climate--Phenology Analyses and Reveals Evidence of  
352 Plasticity.” *Ecology* 98 (3): 647–55.
- 353 Kendrick, Joseph A., Relena R. Ribbons, Aimée T. Classen, and Aaron M. Ellison. 2015.  
354 “Changes in Canopy Structure and Ant Assemblages Affect Soil Ecosystem Variables as a  
355 Foundation Species Declines.” Wiley Online Library. <https://doi.org/10.1890/ES14-00447.1>.
- 356 Körner, C., and D. Basler. 2010. “Phenology under Global Warming.” *Science*.
- 357 Kudo, Gaku, and Takashi Y. Ida. 2013. “Early Onset of Spring Increases the Phenological  
358 Mismatch between Plants and Pollinators.” *Ecology* 94 (10): 2311–20.
- 359 Lapenis, Andrei, Hugh Henry, Mathias Vuille, and James Mower. 2014. “Climatic Factors  
360 Controlling Plant Sensitivity to Warming.” *Climatic Change* 122 (4): 723–34.
- 361 Levin, Simon A. 1992. “The Problem of Pattern and Scale in Ecology: The Robert H. MacArthur  
362 Award Lecture.” *Ecology* 73 (6): 1943–67.
- 363 Memmott, Jane, Paul G. Craze, Nickolas M. Waser, and Mary V. Price. 2007. “Global Warming

- 364 and the Disruption of Plant-Pollinator Interactions.” *Ecology Letters* 10 (8): 710–17.
- 365 Newman, Erica A., Maureen C. Kennedy, Donald A. Falk, and Donald McKenzie. 2019. “Scaling  
366 and Complexity in Landscape Ecology.” *Frontiers in Ecology and Evolution* 7: 293.
- 367 Park, Daniel S., Ian Breckheimer, Alex C. Williams, Edith Law, Aaron M. Ellison, and Charles C.  
368 Davis. 2018. “Herbarium Specimens Reveal Substantial and Unexpected Variation in  
369 Phenological Sensitivity across the Eastern United States.” *Philosophical Transactions of*  
370 *the Royal Society of London. Series B, Biological Sciences* 374 (1763).  
371 <https://doi.org/10.1098/rstb.2017.0394>.
- 372 Park, Daniel S., Newman, Erica A., and Breckheimer, Ian K. Scale gaps in landscape  
373 phenology: challenges and opportunities. *In review*.
- 374 Post, Eric, and Mads C. Forchhammer. 2008. “Climate Change Reduces Reproductive Success  
375 of an Arctic Herbivore through Trophic Mismatch.” *Philosophical Transactions of the Royal*  
376 *Society of London. Series B, Biological Sciences* 363 (1501): 2369–75.
- 377 Price, Mary V., and Nickolas M. Waser. 1998. “Effects of Experimental Warming on Plant  
378 Reproductive Phenology in a Subalpine Meadow.” *Ecology* 79 (4): 1261–71.
- 379 Rossi, S., S. Zhang, A. Deslauries, V. Butto, H. Morin, J. Huang, H. Ren, and S. Khare. 2019.  
380 “Linking Phenocam Derived Phenology with Field Observations in the Boreal Forest.” In  
381 *2019 IEEE International Workshop on Metrology for Agriculture and Forestry*  
382 *(MetroAgriFor)*, 132–33. [ieeexplore.ieee.org](http://ieeexplore.ieee.org).
- 383 Sackett, Tara E., Sydne Record, Sharon Bewick, Benjamin Baiser, Nathan J. Sanders, and  
384 Aaron M. Ellison. 2011. “Response of Macroarthropod Assemblages to the Loss of  
385 Hemlock ( *Tsuga Canadensis* ), a Foundation Species.” *Ecosphere* 2 (7): art74.
- 386 Theobald, Elli J., Ian Breckheimer, and Janneke HilleRisLambers. 2017. “Climate Drives  
387 Phenological Reassembly of a Mountain Wildflower Meadow Community.” *Ecology* 98 (11):  
388 2799–2812.
- 389 Tian, Jiaqi, Xiaolin Zhu, Jin Wu, Miaogen Shen, and Jin Chen. 2020. “Coarse-Resolution

- 390 Satellite Images Overestimate Urbanization Effects on Vegetation Spring Phenology.”  
391 *Remote Sensing* 12 (1): 117.
- 392 Turner, Monica G., Virginia H. Dale, and Robert H. Gardner. 1989. “Predicting across Scales:  
393 Theory Development and Testing.” *Landscape Ecology* 3 (3-4): 245–52.
- 394 Venjakob, Christine, Alexandra-Maria Klein, Anne Ebeling, Teja Tschardt, and Christoph  
395 Scherber. 2016. “Plant Diversity Increases Spatio-Temporal Niche Complementarity in  
396 Plant-Pollinator Interactions.” *Ecology and Evolution* 6 (8): 2249–61.
- 397 Wagner, Helene H., and Marie-Josée Fortin. 2005. “Spatial Analysis of Landscapes: Concepts  
398 and Statistics.” *Ecology* 86 (8): 1975–87.
- 399 Wiens, J. A. 1989. “Spatial Scaling in Ecology.” *Functional Ecology* 3 (4): 385–97.
- 400 Willis, Charles G., Edith Law, Alex C. Williams, Brian F. Franzone, Rebecca Bernardos, Lian  
401 Bruno, Claire Hopkins, et al. 2017. “CrowdCurio: An Online Crowdsourcing Platform to  
402 Facilitate Climate Change Studies Using Herbarium Specimens.” *The New Phytologist* 215  
403 (1): 479–88.
- 404 Wolkovich, Elizabeth M., Benjamin I. Cook, and T. Jonathan Davies. 2014. “Progress towards  
405 an Interdisciplinary Science of Plant Phenology: Building Predictions across Space, Time  
406 and Species Diversity.” *The New Phytologist* 201 (4): 1156–62.
- 407 Woodcock, Curtis E., and Alan H. Strahler. 1987. “The Factor of Scale in Remote Sensing.”  
408 *Remote Sensing of Environment* 21 (3): 311–32.
- 409 Xie, Yingying, and Adam M. Wilson. 2020. “Change Point Estimation of Deciduous Forest Land  
410 Surface Phenology.” *Remote Sensing of Environment* 240 (April): 111698.
- 411 Zhang, Haicheng, Wenping Yuan, Shuguang Liu, Wenjie Dong, and Yang Fu. 2015. “Sensitivity  
412 of Flowering Phenology to Changing Temperature in China.” *Journal of Geophysical  
413 Research: Biogeosciences* 120 (8): 1658–65.
- 414 Zhang, Xiaoyang, Mark A. Friedl, Crystal B. Schaaf, Alan H. Strahler, John C. F. Hodges, Feng  
415 Gao, Bradley C. Reed, and Alfredo Huete. 2003. “Monitoring Vegetation Phenology Using

416           MODIS.” *Remote Sensing of Environment* 84 (3): 471–75.

417   Zhang, Xiaoyang, Jianmin Wang, Feng Gao, Yan Liu, Crystal Schaaf, Mark Friedl, Yunyue Yu,  
418           et al. 2017. “Exploration of Scaling Effects on Coarse Resolution Land Surface Phenology.”  
419           *Remote Sensing of Environment* 190 (March): 318–30.

420   Zohner, Constantin M., and Susanne S. Renner. 2014. “Common Garden Comparison of the  
421           Leaf-out Phenology of Woody Species from Different Native Climates, Combined with  
422           Herbarium Records, Forecasts Long-Term Change.” *Ecology Letters* 17 (8): 1016–25.

423

424

425
